# Supplementary material for: Disruption of p16 and Activation of Kras in Pancreas Increase Ductal Adenocarcinoma Formation and Metastasis in vivo
Source: PubMed Central journal article supplement (PMC3259996; doi:10.18632/oncotarget.357), 2011-11-23
Supplement: oncotarget-02-862-s003.pdf [file oncotarget-02-862-s003.pdf]

## SUPPLEMENTARY TABLE

**Table S1. A representative histologic analysis of invasive pancreatic cancer in  $p16^{-/-}$ ;  $LSL-Kras^{G12D}$ ;  $Pdx1-Cre$  mice.**

| ID    | Age (days) | Invasive CA* pattern | Invasive CA size | CA(%) sarcom* | CA(%) adeno* | CA(%) anapl* | METs**      |
|-------|------------|----------------------|------------------|---------------|--------------|--------------|-------------|
| 8-289 | 42         | diffuse              | 15mm             | 95            | 5            |              |             |
| 7-59  | 74         | diffuse              | 13mm             | 10            | 50           | 40           | liver       |
| 7-992 | 83         | focal                | 3mm              | 10            | 80           | 10           |             |
| 7-883 | 84         | focal                | 3 mm             | 20            | 5            | 75           |             |
| 9-36  | 85         | diffuse              | 30mm             | 40            | 10           | 50           | LN's        |
| 7-478 | 88         | diffuse              | 27mm             |               | 90           | 10           | LN's        |
| 7-756 | 89         | diffuse              | 16mm             | 10            | 80           | 10           | LN's, liver |
| 7-57  | 98         | diffuse              | 14mm             | 5             | 75           | 20           | liver       |
| 8-284 | 98         | diffuse              | 20mm             | 80            | 15           | 5            |             |
| 8-111 | 102        | diffuse              | 20mm             | 20            | 60           | 20           |             |
| 7-757 | 103        | diffuse              | 20mm             | 20            | 80           |              |             |
| 7-744 | 108        | diffuse              | 20mm             | 70            | 20           | 10           | liver, lung |
| 8-99  | 109        | diffuse              | 16mm             | 50            | 50           |              |             |
| 7-56  | 110        | diffuse              | 20mm             | 95            | 5            |              |             |
| 8-285 | 112        | diffuse              | 17mm             | 60            | 20           | 20           |             |
| 8-810 | 116        | diffuse              | 10mm             | 90            | 10           |              | liver       |
| 8-490 | 121        | diffuse              | 12mm             | 10            | 80           | 10           | liver       |
| 8-901 | 122        | multifocal           | 1- 5 mm          | 40            | 50           | 10           |             |
| 7-513 | 123        | diffuse              | 20mm             | 90            |              | 10           |             |
| 7-565 | 128        | diffuse              | 10mm             | 20            | 80           |              |             |
| 8-282 | 136        | diffuse              | 13mm             | 40            | 50           | 10           |             |
| 7-65  | 141        | diffuse              | 15mm             | 10            | 90           |              | liver       |

\*CA-cancer; sarcom-sarcomatoid; adeno-adenocarcinoma; anapl-anaplastic; METs-metastasis.

\*\*Mice were sacrificed based on age for analysis of their primary pancreatic tumors, therefore not all of them had reached non-thriving stage and metastasis had not yet developed in some of them.

**Table S2. Histologic analysis of pancreatic neoplasms in *p16<sup>flox/flox</sup>*; *LSL-Kras<sup>G12D</sup>*; *Pdx1-Cre* mice.**

| ID     | Age (days) | Preinvasive neoplasm <sup>+</sup> | Invasive CA <sup>*</sup> pattern <sup>+</sup> | Invasive CA size | CA(%) sarcom | CA(%) adeno | CA(%) anapl. | METs <sup>**</sup> |
|--------|------------|-----------------------------------|-----------------------------------------------|------------------|--------------|-------------|--------------|--------------------|
| 11-257 | 49         | PanIN-3                           | -                                             |                  |              |             |              |                    |
| 18-128 | 88         | PanIN-1                           | -                                             |                  |              |             |              |                    |
| 18-140 | 88         | PanIN-1                           | -                                             |                  |              |             |              |                    |
| 19-268 | 93         | PanIN-2                           | -                                             |                  |              |             |              |                    |
| 20-857 | 93         |                                   | diffuse                                       | 30mm             | 10           | 90          |              | liver              |
| 20-792 | 98         |                                   | diffuse                                       | 18mm             | 20           | 80          |              | liver              |
| 20-622 | 98         |                                   | diffuse                                       | 8 mm             |              | 80          | 20           |                    |
| 19-713 | 108        | PanIN-1                           | -                                             |                  |              |             |              |                    |
| 19-799 | 108        | PanIN-3                           | -                                             |                  |              |             |              |                    |
| 20-301 | 113        |                                   | focal                                         | 3 mm             |              | 40          | 60           |                    |
| 18-717 | 120        |                                   | diffuse                                       | 10 mm            | 80           | 10          | 10           |                    |
| 17-877 | 120        |                                   | diffuse                                       | 30 mm            | 20           | 10          | 70           | duo.               |
| 17-879 | 123        |                                   | diffuse                                       | 28 mm            |              | 80          | 20           | liver              |
| 17-758 | 128        |                                   | diffuse                                       | 9 mm             | 75           | 15          | 10           | duo.               |
| 17-855 | 128        | PanIN-3                           | -                                             |                  |              |             |              |                    |
| 16-104 | 136        | PanIN-3                           | -                                             |                  |              |             |              |                    |
| 15-269 | 146        |                                   | diffuse                                       | 14 mm            | 5            | 80          | 15           | liver              |

<sup>+</sup>The highest PanIN lesion was recorded if no invasive cancer was detected.

<sup>\*</sup>CA-cancer; sarcom-sarcomatoid; adeno-adenocarcinoma; anapl-anaplastic; METs-metastasis.

<sup>\*\*</sup>Mice were sacrificed based on age for analysis of their primary pancreatic tumors, therefore not all of them had reached non-thriving stage and metastasis had not yet developed in some of them.

**Table S3.** Two primary pancreatic cancer cell lines with LOH at *Kras* were analyzed by qPCR (SYBR Green) for *Kras* amplification.

| <b>Sample</b>            | <b><math>\Delta\Delta Ct^*</math></b> | <b>Rel. copy number<br/><i>Kras</i> mutant<sup>**</sup></b> | <b><i>Kras</i><br/>amplification</b> |
|--------------------------|---------------------------------------|-------------------------------------------------------------|--------------------------------------|
| LOH at <i>Kras</i><br>#1 | 0.9233                                | 1.0544                                                      | Negative                             |
| LOH at <i>Kras</i><br>#2 | 1.1633                                | 0.8928                                                      | Negative                             |

\*Values provided represent means derived from triplicate assays of the same sample. Mean  $\Delta\Delta Ct$  values of *the cell line with LOH* vs. 2 copy control obtained from corresponding standard curves.

\*\* Relative copy number values of *Kras* for each cell line with LOH.
